# Supplementary material for: High incidence of asymptomatic genital tract infections in pregnancy in adolescent girls and young women: need for repeat aetiological screening
Source: HighWire-hosted journal article supplement (doi:10.1136/sextrans-2022-055658), 2023-05-19
Supplement: sextrans-2022-055658supp001_data_supplement.pdf [file sextrans-2022-055658supp001_data_supplement.pdf]

**Supplementary Table: Characteristics of Women who did not return for followup in comparison with women who returned for 3<sup>rd</sup> trimester study visit**

| Variable                                  | Participants Returned | Participants Lost to Followup | P Value |
|-------------------------------------------|-----------------------|-------------------------------|---------|
|                                           | N=462                 | N=290                         |         |
| <b>Age, mean (SD)</b>                     | 23.8 (5.1)            | 23.4 (5.3)                    | 0.244   |
| <20 years n (%)                           | 106 (22.9)            | 74 (25.5)                     |         |
| >20 years n (%)                           | 356 (77.1)            | 216 (74.5)                    | 0.483   |
| <b>Relationship n (%)</b>                 |                       |                               |         |
| Living with Partner                       | 60 (13.0)             | 38 (13.1)                     | 1.00    |
| Not Living with Partner                   | 402 (87.0)            | 252 (86.9)                    |         |
| <b>Partner &gt;5 years older n (%)</b>    |                       |                               |         |
| Yes                                       | 194 (42.0)            | 137 (47.2)                    | 0.258   |
| No                                        | 268 (58.0)            | 153 (52.8)                    |         |
| <b>Bacterial Vaginosis n (%)</b>          |                       |                               |         |
| Pos                                       | 158 (34.2)            | 122 (42.1)                    | 0.063   |
| Neg                                       | 304 (65.8)            | 168 (57.9)                    |         |
| <b><i>C. trachomatis</i> n (%)</b>        |                       |                               |         |
| Pos                                       | 50 (10.8)             | 23 (7.9)                      | 0.207   |
| Neg                                       | 412 (89.2)            | 267 (92.1)                    |         |
| <b><i>N. gonorrhoea</i> n (%)</b>         |                       |                               |         |
| Pos                                       | 32 (6.9)              | 11 (3.8)                      | 0.077   |
| Neg                                       | 430 (93.1)            | 279 (96.2)                    |         |
| <b><i>T. vaginalis</i> n (%)</b>          |                       |                               |         |
| Pos                                       | 87 (18.8)             | 28 (9.7)                      | <0.001  |
| Neg                                       | 375 (81.2)            | 262 (90.3)                    |         |
| <b>Symptomatic and Received Treatment</b> |                       |                               |         |
| Yes                                       | 192 (41.6)            | 120 (41.4)                    | 0.820   |
| No                                        | 270 (58.4)            | 170 (58.6)                    |         |
